# Supplementary material for: Oxidation, defunctionalization and catalyst life cycle of carbon nanotubes: a Raman spectroscopy view
Source: Royal Society of Chemistry journal article supplement (doi:10.1039/c6cp04657f), 2016-12-12
Supplement: c6cp04657f1.pdf [file c6cp04657f1.pdf]

## Supporting information

for the article “Oxidation, defunctionalization and catalyst life cycle of carbon nanotubes: Raman spectroscopy view” by Sergei A. Chernyak, Anthon S. Ivanov, Konstantin I. Maslakov, Alexander V. Egorov, Zexiang Shen, Serguei S. Savilov, Valery V. Lunin

### S-1. TGA data for pristine CNTs and those oxidized in nitric acid for 12 h

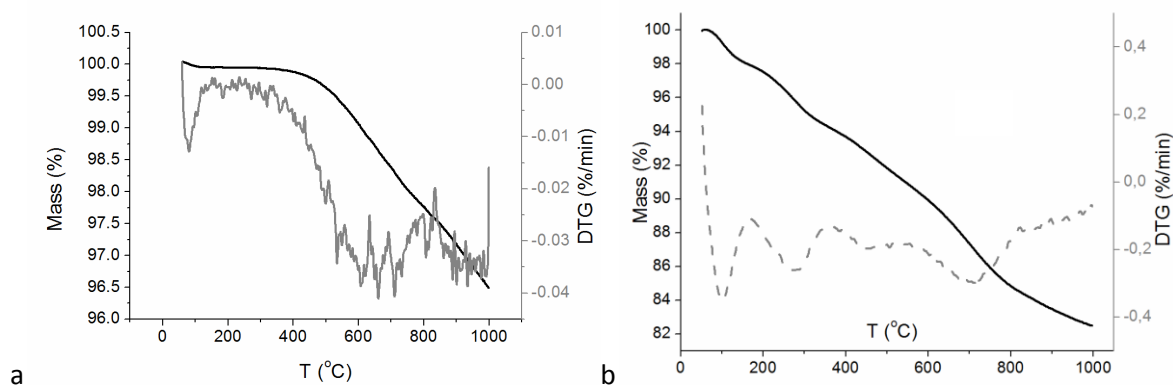

Figure S-1. a – TG and DTG curves for CNTp obtained in air flow at heating rate of 10°/min ; b – TG and DTG curves for CNT12 obtained in Ar flow at heating rate of 10°/min

## S-2. Raman spectra

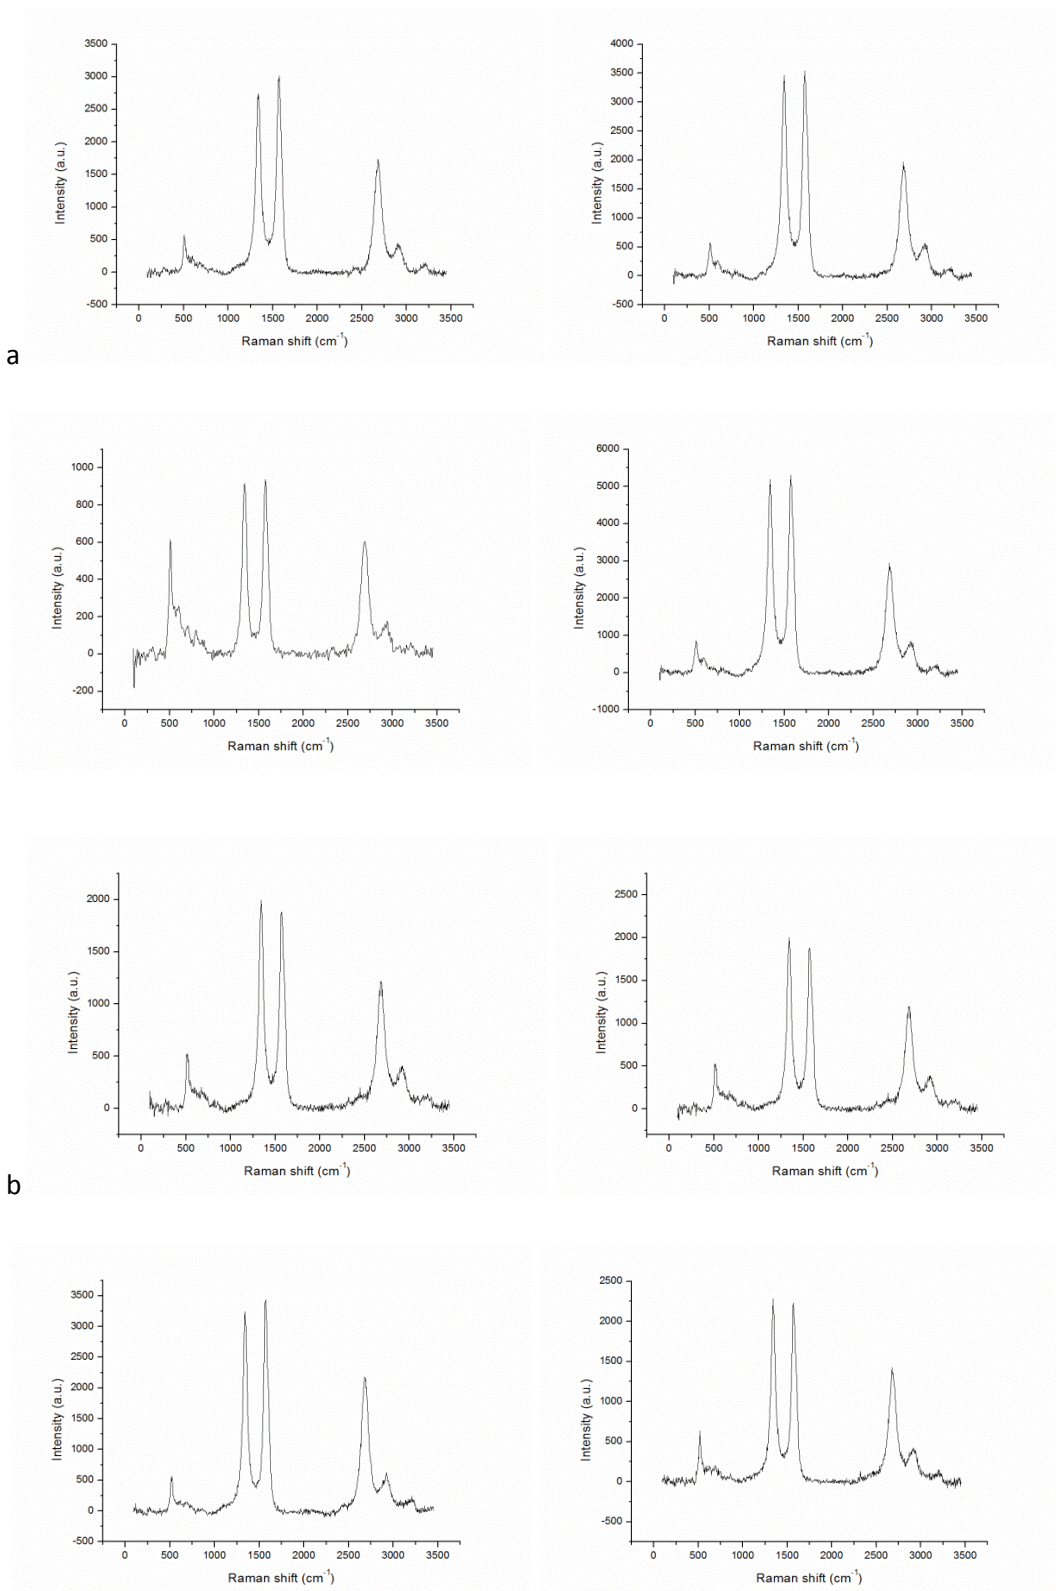

C

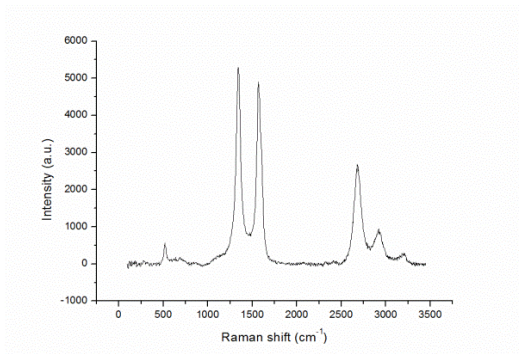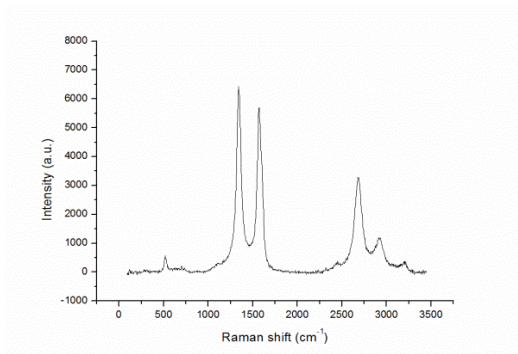

d

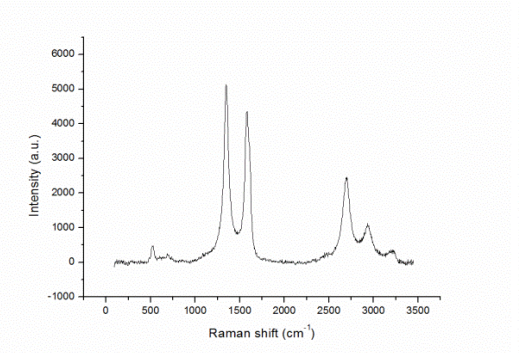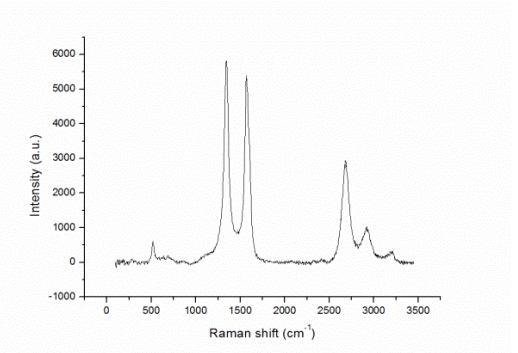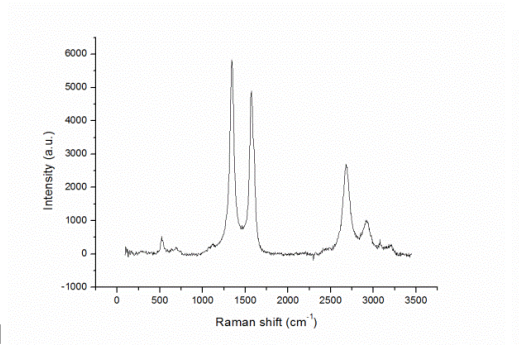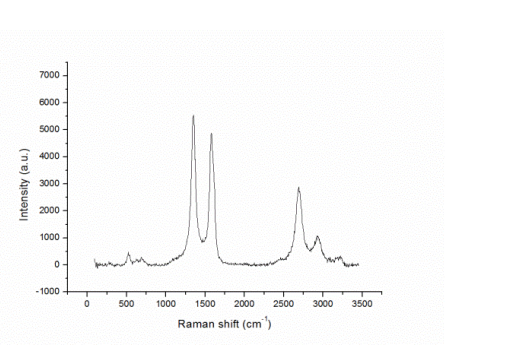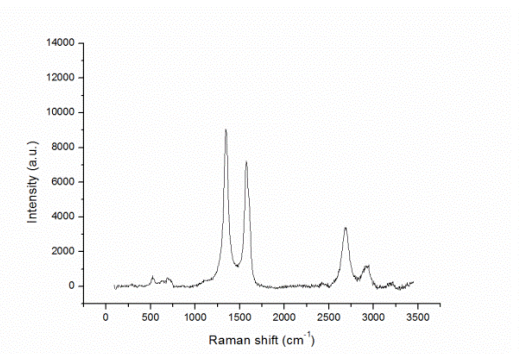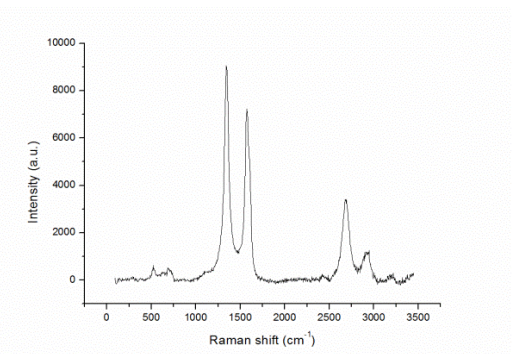

e

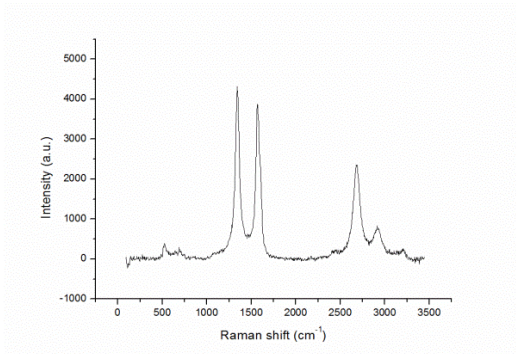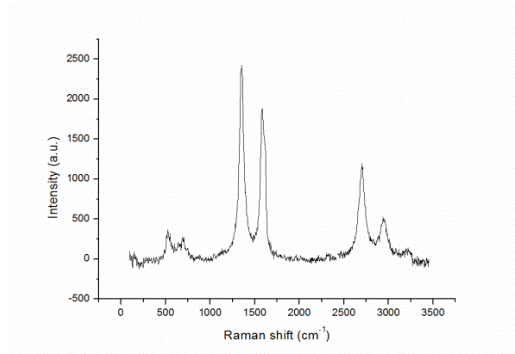

f

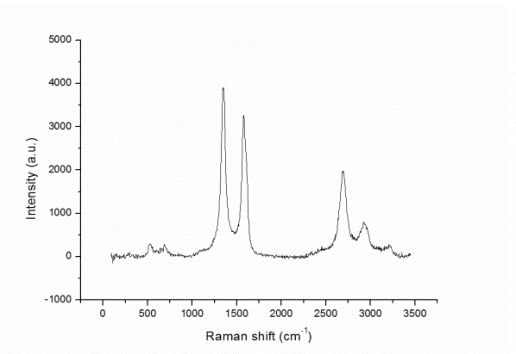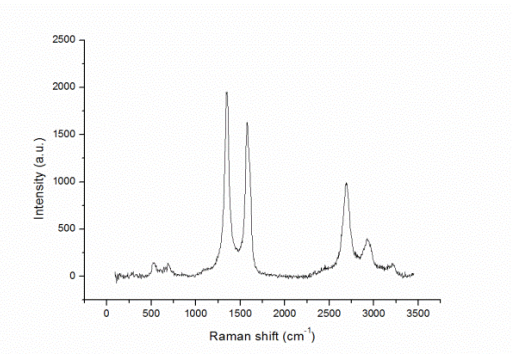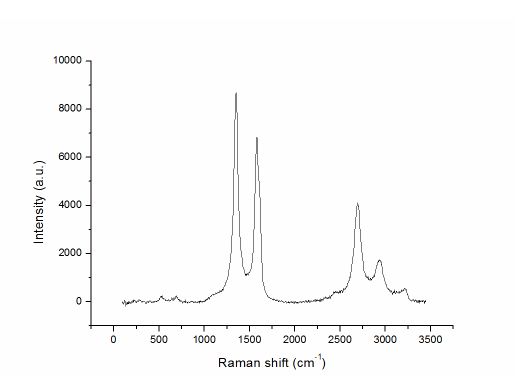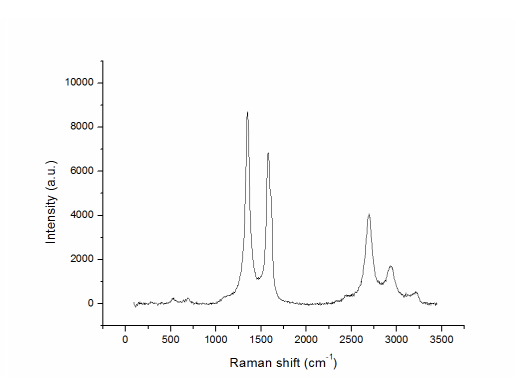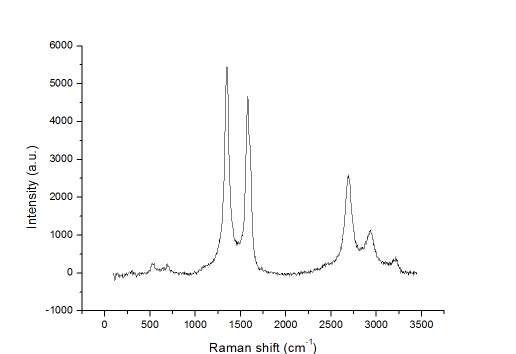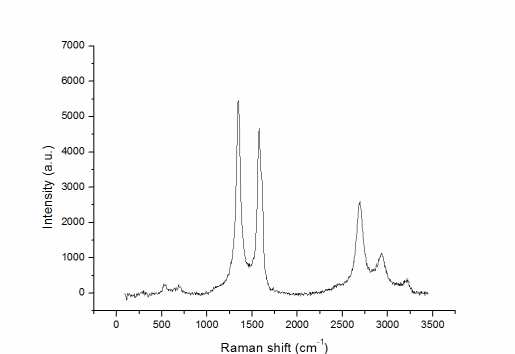

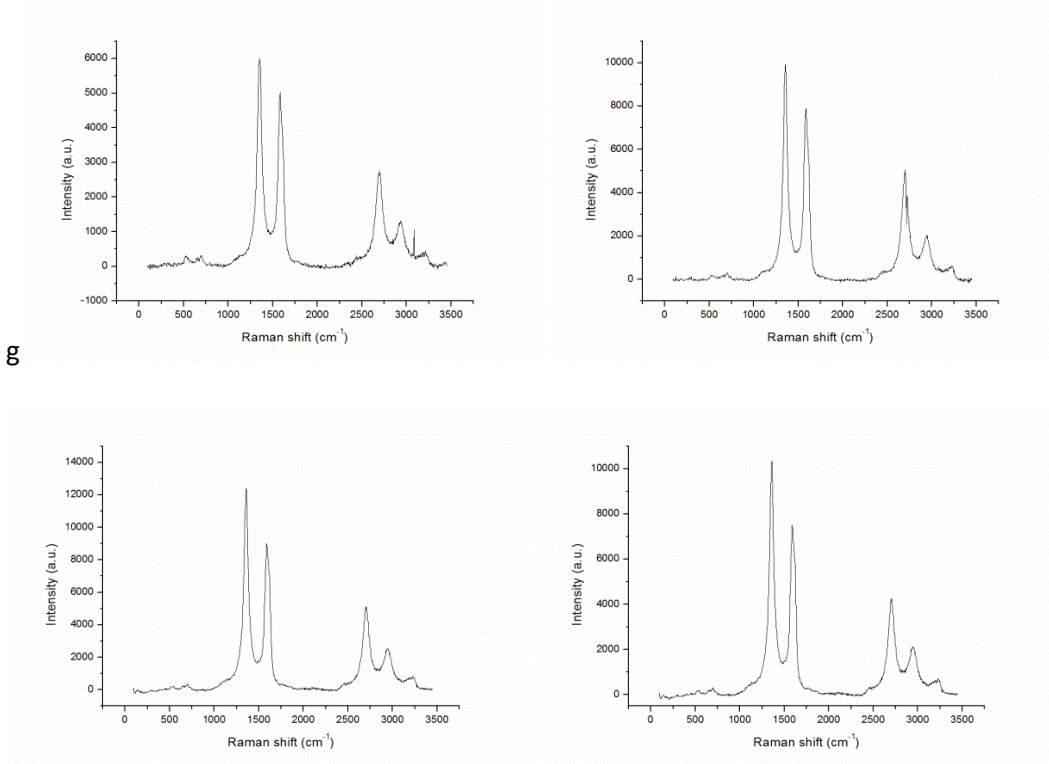

Figure S-2.1. Raman spectra of the samples: a – CNTp, b – CNT1, c – CNT3, d – CNT6, e – CNT9, f – CNT12, g – CNT15.

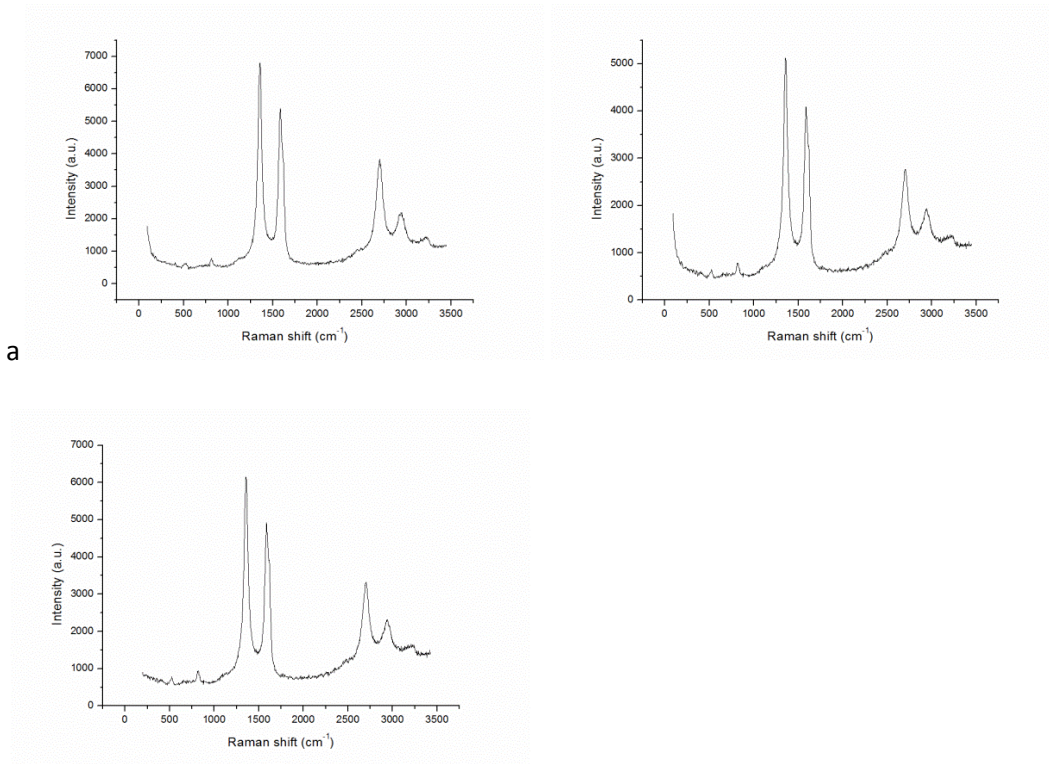

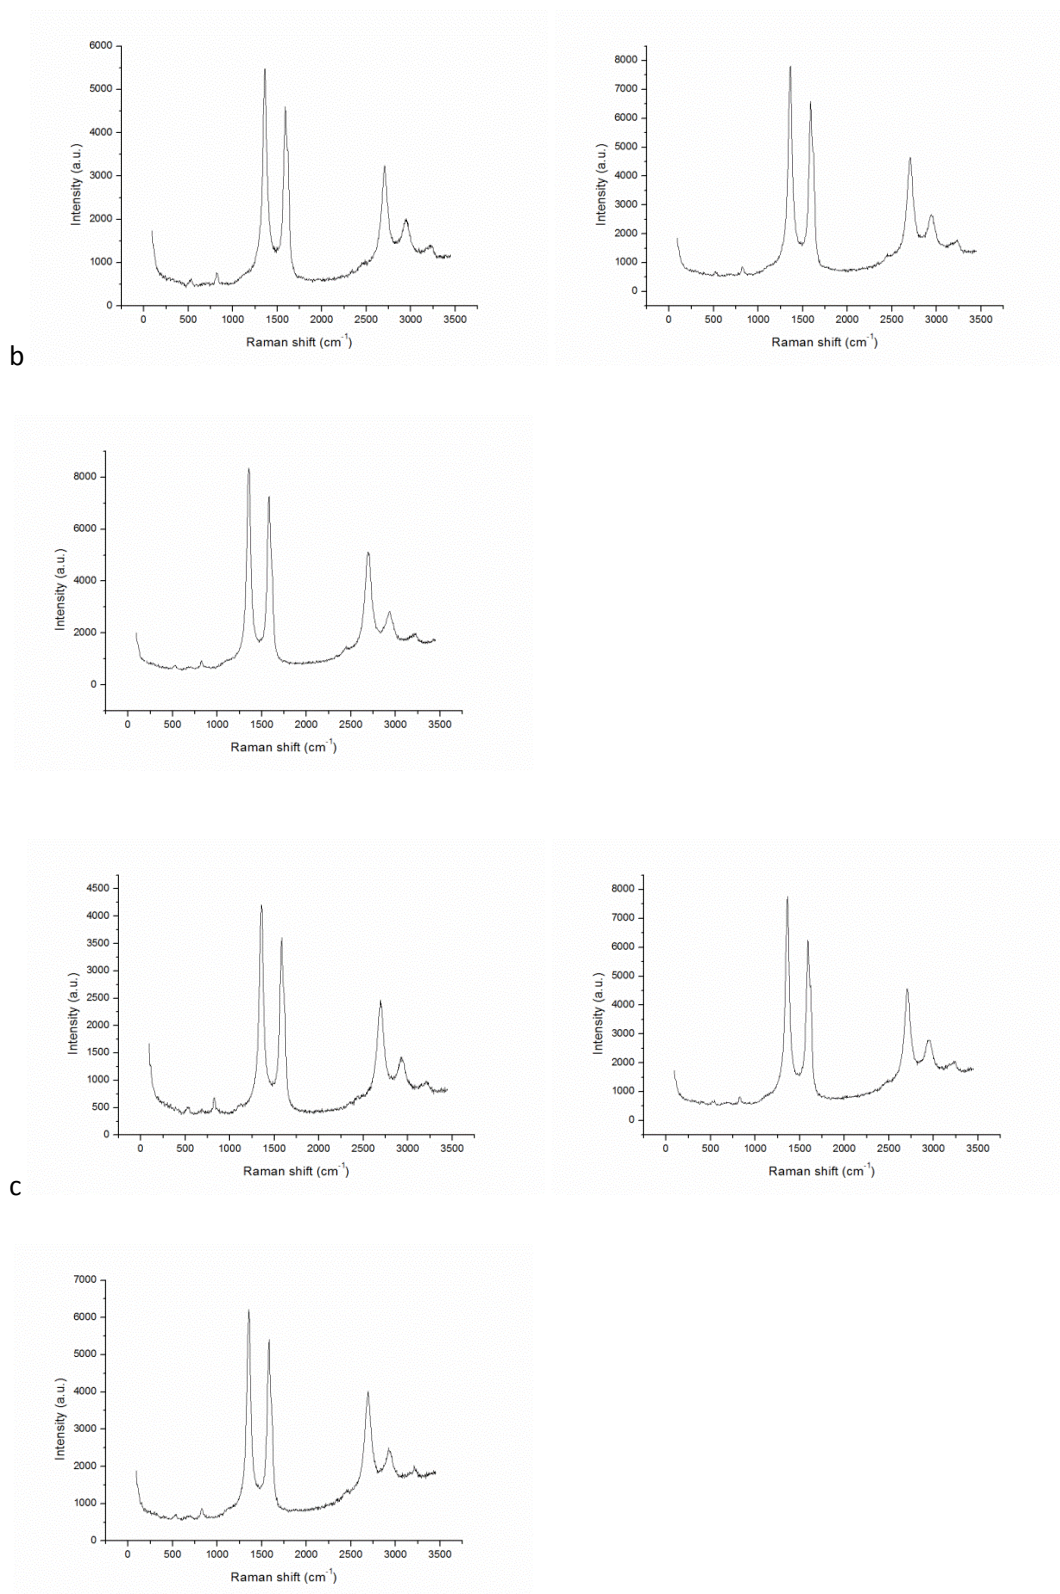

Figure S-2.2. Raman spectra of the annealed CNT samples. Annealing temperature: a – 160, b – 370, c – 530.

a

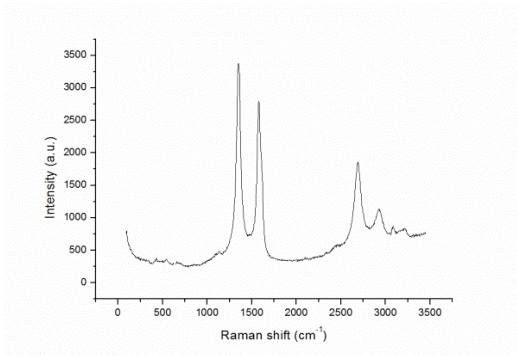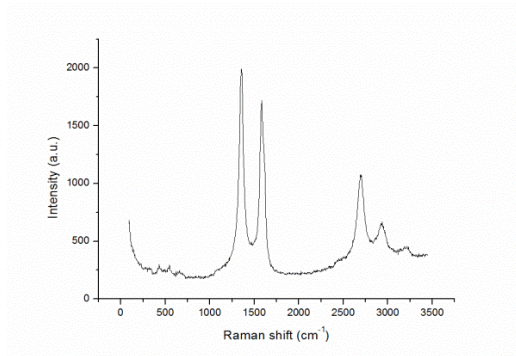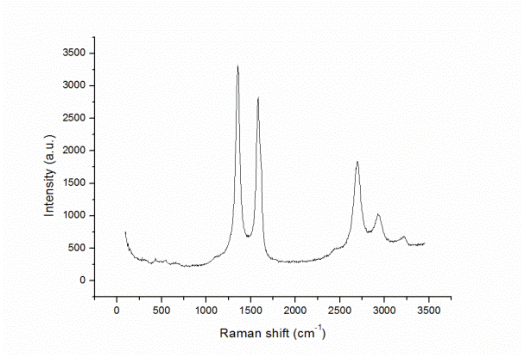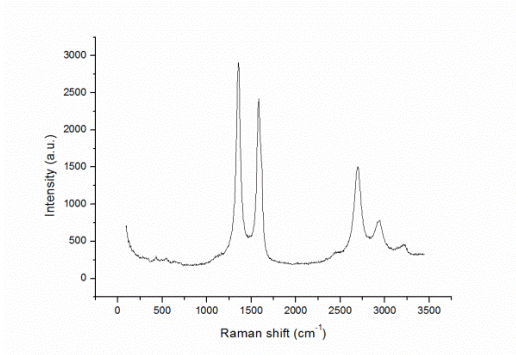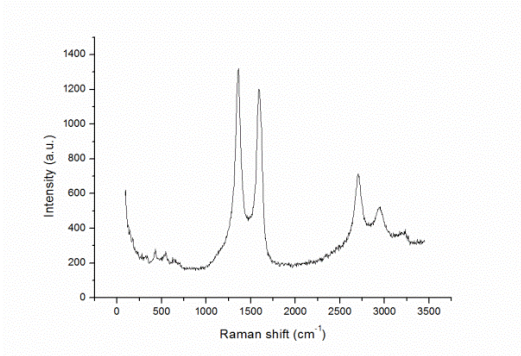

b

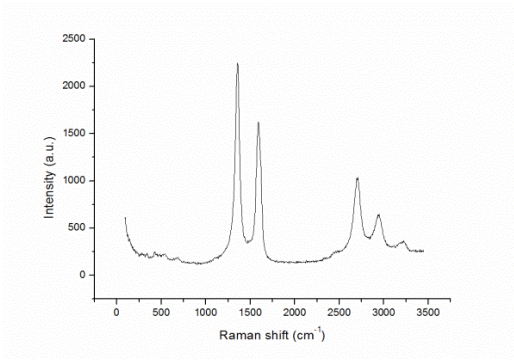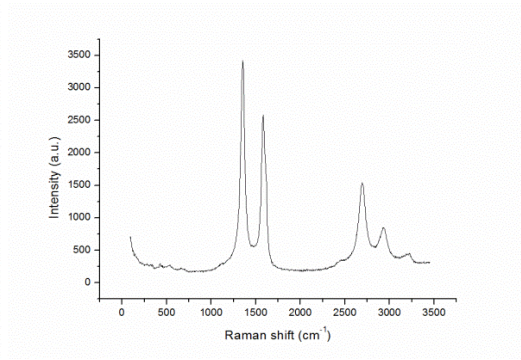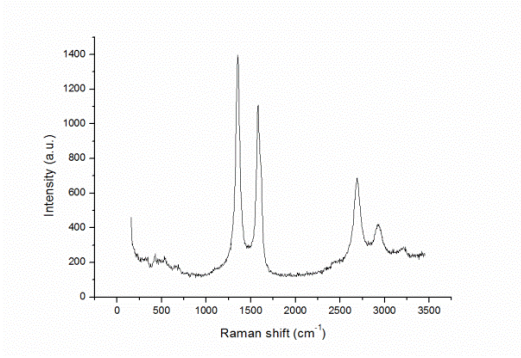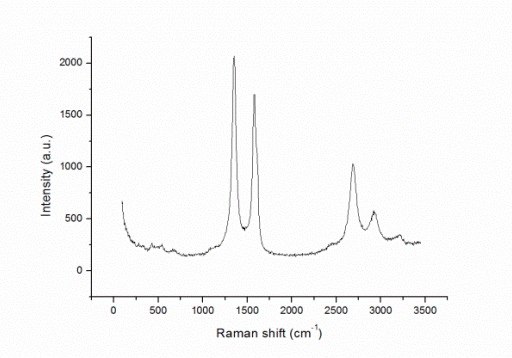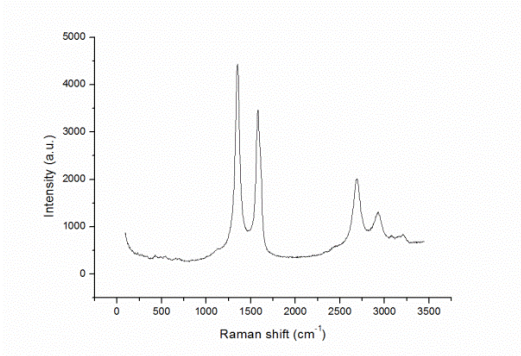



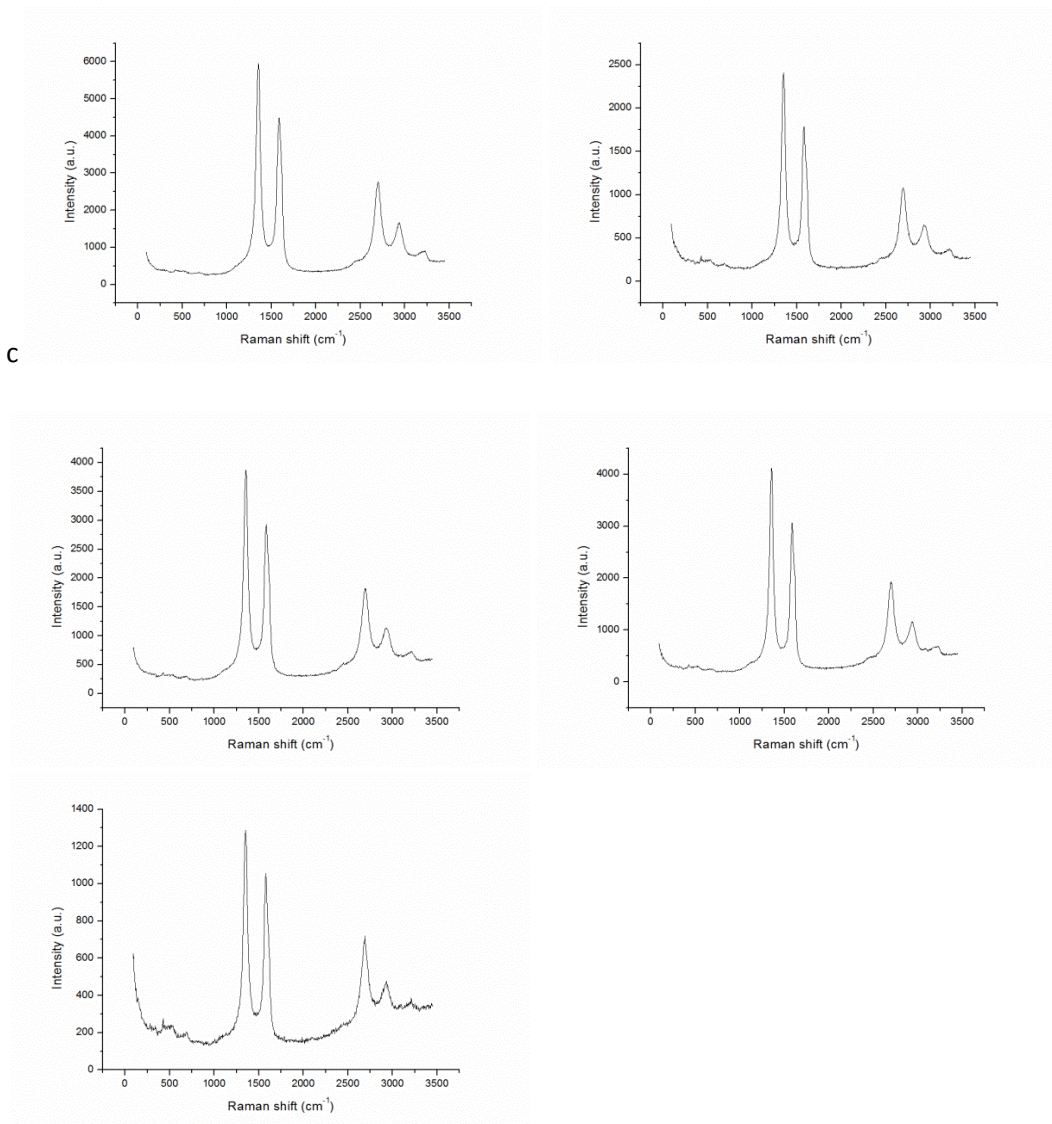

Figure S-2.3. Raman spectra of the samples: a – N2-CNT, b – H2-CNT, c – FTS-CNT.

### S-3. Effect of the oxidation time on the relative areas of D bands and G band

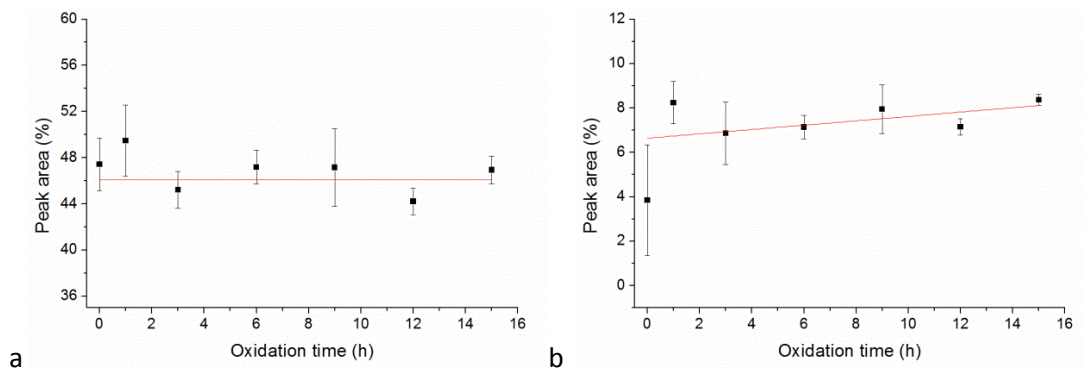

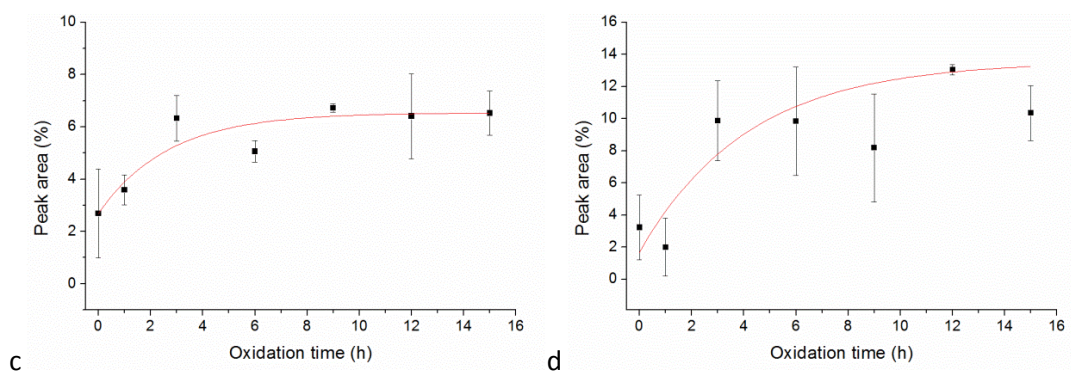

Figure S-3 Relative areas of D1 (a), D2 (b), D3 (c), and D4 (d) bands in Raman spectra of oxidized CNTs in percentage of total area under 900–1800  $\text{cm}^{-1}$  region.

**The equations used for curve fitting and obtained best-fit parameters:**

D1:  $y = y_0, y_0 = 46.1$

D2:  $y = A + B \cdot x, A = 6.6 B = 0.1$

D3:  $y = A_1 \cdot \exp(x/t_1) + A_2 \cdot \exp(x/t_2) + A_3 \cdot \exp(x/t_3) + y_0, y_0 = 6.5 A_1 = -1.3 t_1 = -2.7 A_2 = -1.3 t_2 = -2.7 A_3 = -1.3 t_3 = -2.7$

D4:  $y = y_0 + A \cdot \exp(k \cdot x), y_0 = 13.6 A = -11.9 k = -0.2$

G:  $y = A_1 \cdot \exp(x/t_1) + A_2 \cdot \exp(x/t_2) + y_0, y_0 = -351503 A_1 = 12.8 t_1 = 1.2 A_2 = 351535 t_2 = 1.7$

**S-4. BET and XPS data**

**Table S-4.** BET specific surface area and XPS oxygen content in pristine and oxidized CNTs.

| Oxidation time (h) | $S_{\text{BET}}$ ( $\text{m}^2/\text{g}$ ) | $\text{O}_{\text{XPS}}$ (at.%) |
|--------------------|--------------------------------------------|--------------------------------|
| 0                  | 192 <sub>5</sub>                           | 0.3                            |
| 1                  | 225 <sub>5</sub>                           | 6.5                            |
| 3                  | 233 <sub>5</sub>                           | 8.0                            |
| 6                  | 237 <sub>5</sub>                           | 8.6                            |
| 9                  | 249 <sub>5</sub>                           | 8.9                            |
| 12                 | 246 <sub>5</sub>                           | 8.7                            |

### S-5. TEM study of CNTs

Average CNT diameter and its distribution were calculated from TEM images. At least 100 nanotubes were processed.

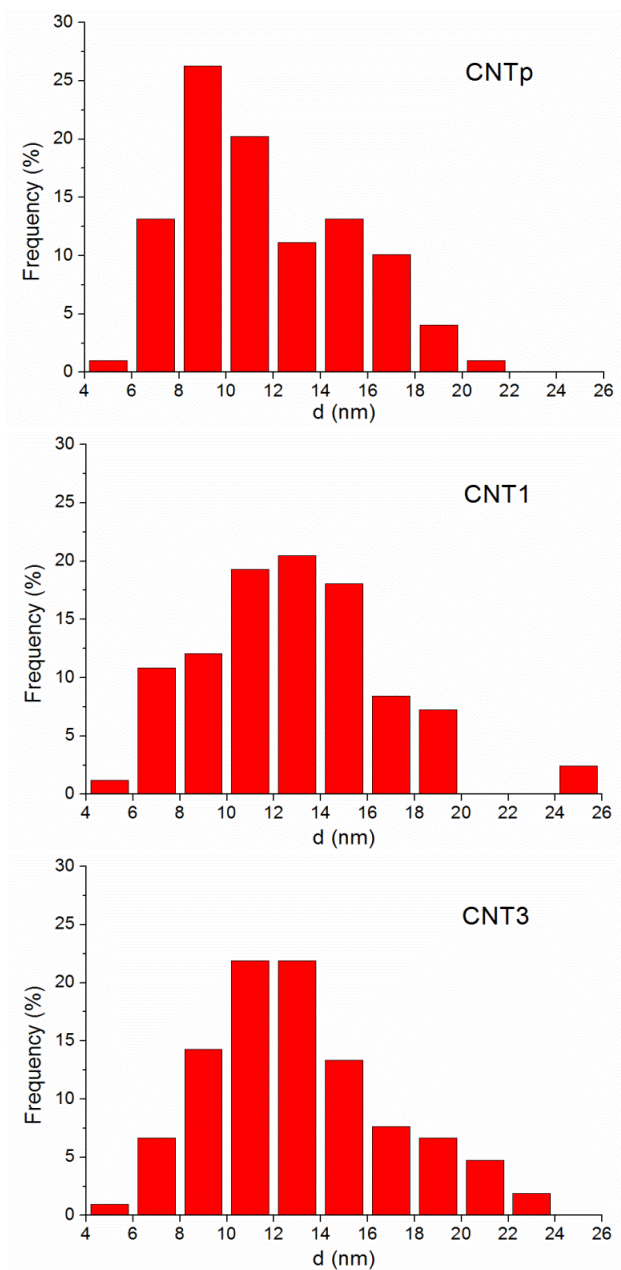

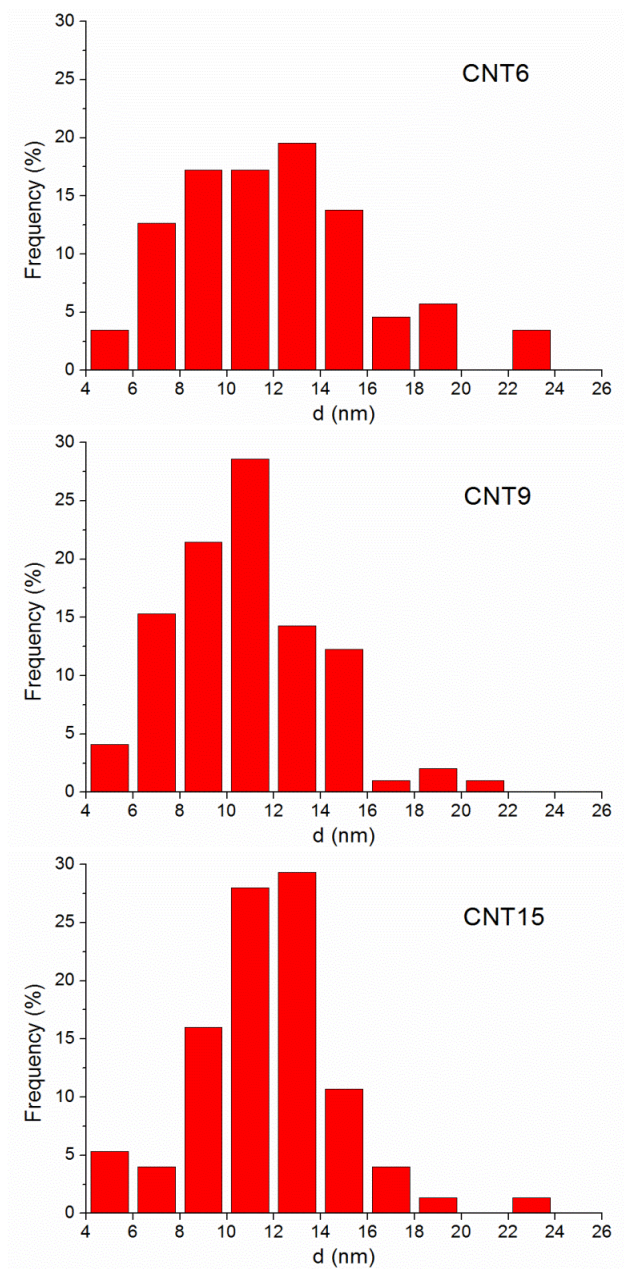

Figure S-5.1. CNT diameter distribution after different time of oxidation

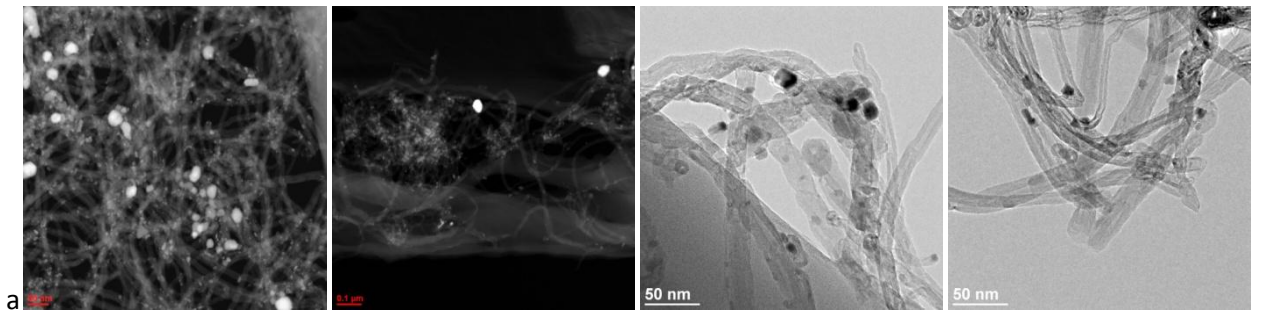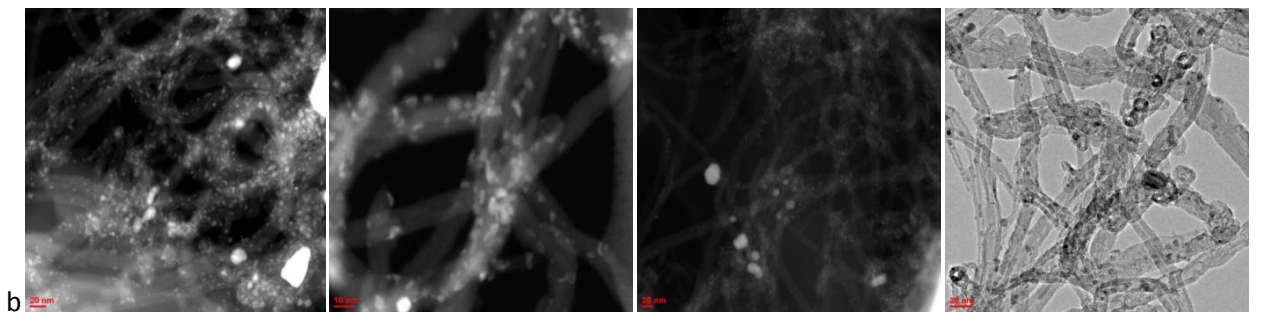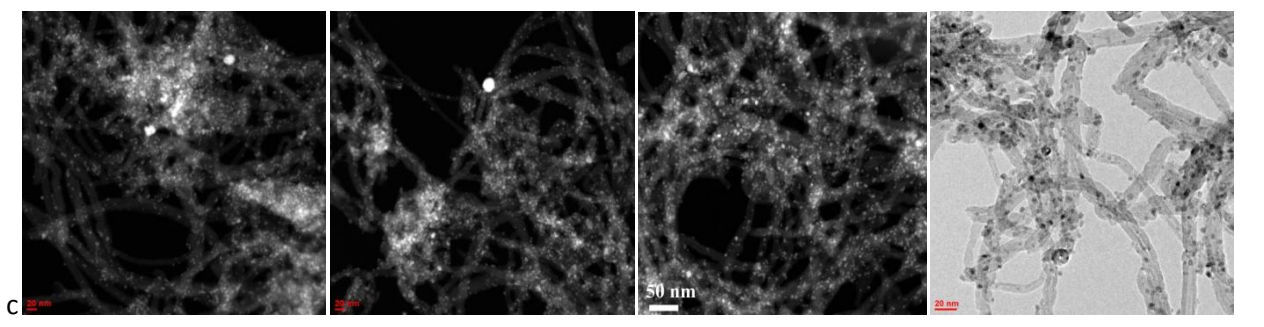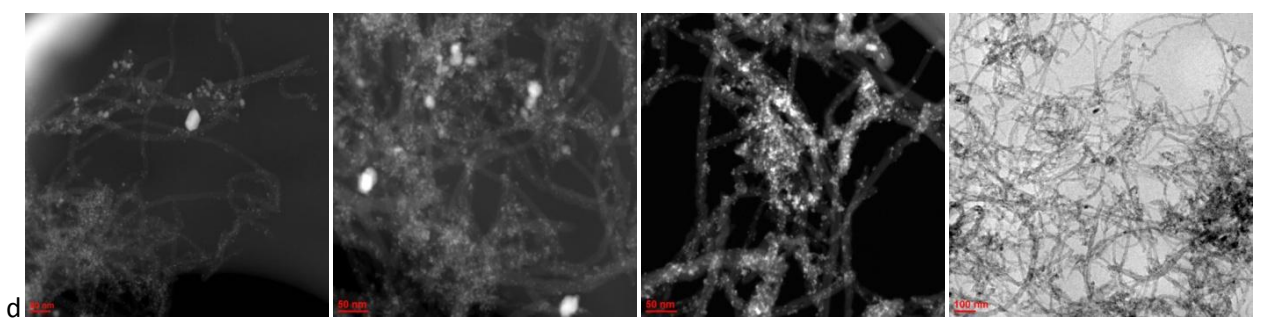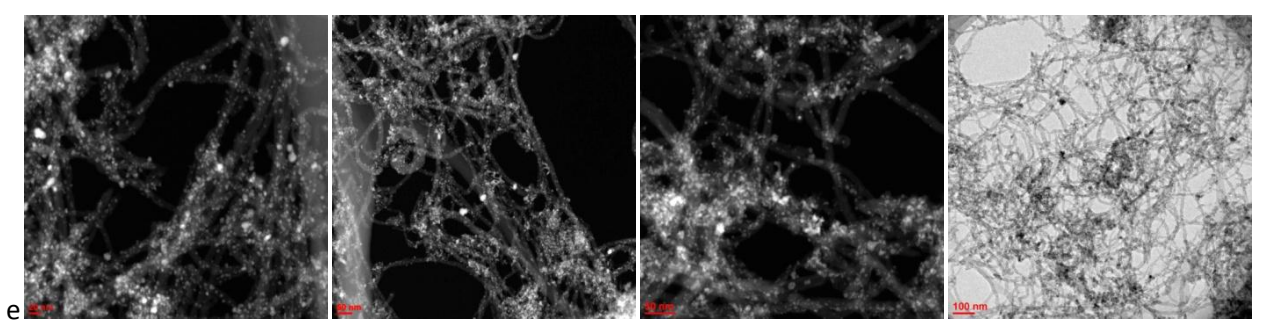

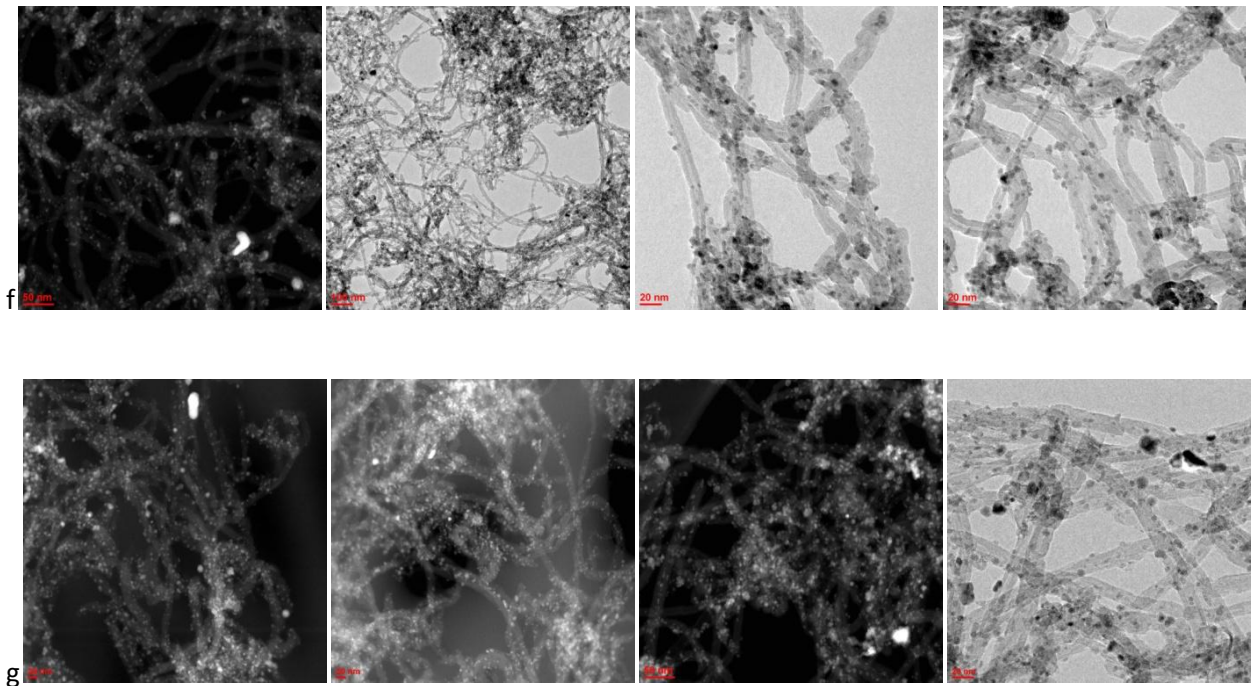

Figure S-5.2. TEM images used for the calculation of CNT diameters. Images are from Co based catalyst supported on appropriate nanotubes: a – CNTp, b – CNT1, c – CNT3, d – CNT6, e – CNT9, f – CNT12, g – CNT15.

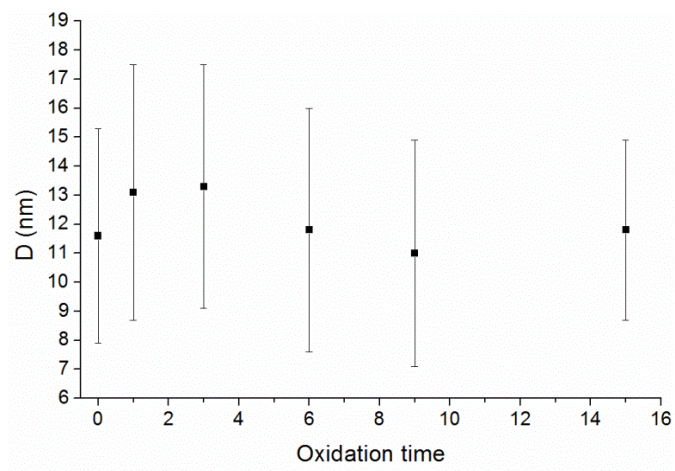

Figure S-5.3. Average diameter of CNTs and its standard deviation against the oxidation time

## S-6. Effect of the oxidation time on the intensity ratios of D bands to G band.

The equations used for curve fitting and obtained best-fit parameters:

$$I_{D1}/I_G: y = y_0 + A \cdot \exp(x/t), y_0 = 1.7 \quad A = -0.3 \quad t = -4.1$$

$$I_{D2}/I_G: y = a + b \cdot x + c \cdot r^x, a = 0.33 \quad b = 0.01 \quad c = -0.15 \quad r = 0.07$$

$$I_{D3}/I_G : y = y_0 + A \cdot \exp(x/t), y_0 = 0.07 \quad A = -0.04 \quad t = -1.3$$

$$I_{D4}/I_G : y = y_0 + A \cdot \exp(x/t), y_0 = 0.06 \quad A = -0.05 \quad t = -4.0$$

### S-7. Disordered bands to G band intensity ratios in CNT12 annealed at different temperatures

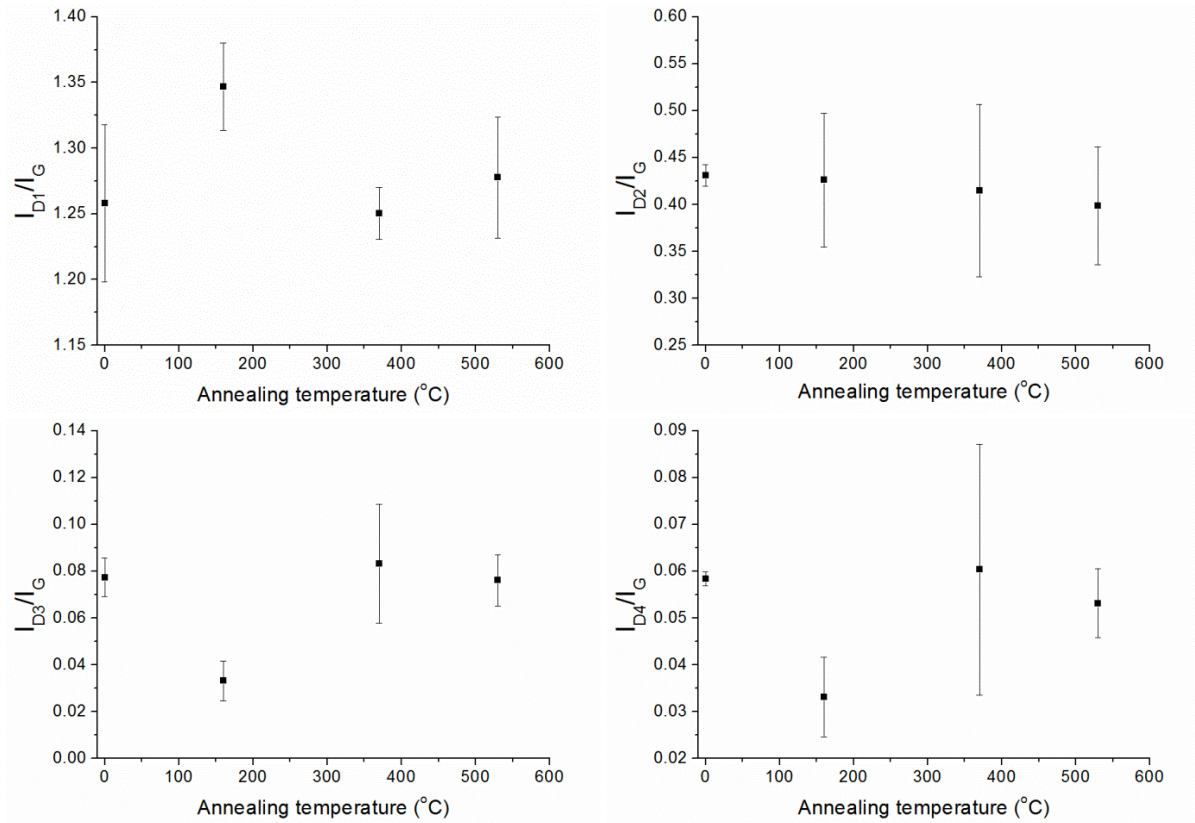

Figure S-7. Disordered bands to G band intensity ratios in CNT12 annealed at different temperatures
